# Supplementary material for: Kaempferol as a Dietary Anti-Inflammatory Agent: Current Therapeutic Standing
Source: PubMed Central journal article supplement (PMC7570692; doi:10.3390/molecules25184073), 2020-09-07
Supplement: molecules-25-04073-s001.pdf [file molecules-25-04073-s001.pdf]

Supplementary Table 1. Botanical sources of kaempferol/glycosides.

| Species                     | Family         | Kaempferol/glycosides                                                                                                                                                                                                                                                              | References |
|-----------------------------|----------------|------------------------------------------------------------------------------------------------------------------------------------------------------------------------------------------------------------------------------------------------------------------------------------|------------|
| <i>Abutilon theophrasti</i> | Malvaceae      | kaempferol 3-O- $\beta$ -glucopyranoside,<br>kaempferol 7-O- $\beta$ -diglucoside                                                                                                                                                                                                  | [1]        |
| <i>Acaenasplendens</i>      | Rosaceae       | 7-O-acetyl-3-O- $\beta$ -D-glucosyl-kaempferol                                                                                                                                                                                                                                     | [2]        |
| <i>Aceriphyllumrossii</i>   | Saxifragaceae  | kaempferol 3-O- $\alpha$ -L-rhamnopyranosyl-<br>(1 $\rightarrow$ 6)- $\beta$ -D-glucopyranoside, kaempferol                                                                                                                                                                        | [3]        |
| <i>Acacia nilotica</i>      | Leguminosae    | Kaempferol                                                                                                                                                                                                                                                                         | [4]        |
| <i>Aconitum spp</i>         | Ranunculaceae  | kaempferol 3-O-(6-trans-p-coumaroyl)- $\beta$ -<br>glucopyranosyl-(12)- $\beta$ -glucopyranoside-<br>7-O- $\alpha$ -rhamnopyranoside, kaempferol 7-<br>O-(6-trans-p-coumaroyl)- $\beta$ -<br>glucopyranosyl-(13)- $\alpha$ -<br>rhamnopyranoside-3-O- $\beta$ -<br>glucopyranoside | [5]        |
| <i>Aconitum paniculatum</i> | Ranunculaceae  | Kaempferol 3-O- $\beta$ -(2' '-<br>acetyl)galactopyranoside                                                                                                                                                                                                                        | [6]        |
| <i>Actinidia valvata</i>    | Actinidiaceae  | Kaempferol, kaempferol 3-O- $\beta$ -D-<br>galactopyranoside, kaempferol 3-O- $\alpha$ -L-<br>rhamnopyranosyl-(1 $\rightarrow$ 3)-(4-O-acetyl- $\alpha$ -L-<br>rhamnopyranosyl)-(1 $\rightarrow$ 6)- $\beta$ -D-<br>galactopyranoside.                                             | [7]        |
| <i>Aconitum napellus</i>    | Ranunculaceae  | kaempferol 7-O-(6-trans-p-coumaroyl)- $\beta$ -<br>glucopyranosyl-(13)- $\alpha$ -<br>rhamnopyranoside-3-O- $\beta$ -<br>glucopyranoside                                                                                                                                           | [8]        |
| <i>Adina racemosa</i>       | Rubiaceae      | Kaempferol 3-O- $\alpha$ -L -rhamnopyranosyl-<br>(1 $\rightarrow$ 6)-[(4-O-trans-p-coumaroyl)- $\alpha$ -L -<br>rhamnopyranosyl (1 $\rightarrow$ 2)]-(4-O-trans-p-<br>coumaroyl)- $\beta$ -D-galactopyranoside                                                                     | [9]        |
| <i>Allium cepa</i>          | Alliaceae      | Kaempferol                                                                                                                                                                                                                                                                         | [10]       |
| <i>Allium porrum</i>        | Alliaceae      | Kaempferol 3-O-[2-O-(trans-3-methoxy-<br>4-hydroxycinnamoyl)- $\beta$ -D-<br>galactopyranosyl]-(1 $\rightarrow$ 4)-O- $\beta$ -D-<br>glucopyranoside, kaempferol glycosides                                                                                                        | [11]       |
| <i>Aloe vera</i>            | Asphodelaceae  | Kaempferol                                                                                                                                                                                                                                                                         | [12]       |
| <i>Althaea rosea</i>        | Malvaceae      | Kaempferol                                                                                                                                                                                                                                                                         | [13]       |
| <i>Argyreiap speciosa</i>   | Convolvulaceae | Kaempferol 7-O methyl 3-sulphate                                                                                                                                                                                                                                                   | [14]       |
| <i>Apocynum venetum</i>     | Apocynaceae    | kaempferol 6'-O-acetate                                                                                                                                                                                                                                                            | [15,16]    |
| <i>Astragalus caprinus</i>  | Leguminosae    | Kaempferol 3-O-[[ $\beta$ -D-<br>xylopyranosyl(1 $\rightarrow$ 3)- $\alpha$ -L-<br>rhamnopyranosyl(1 $\rightarrow$ 6)]] $\beta$ -D-<br>apiofuranosyl(1 $\rightarrow$ 2)]]- $\beta$ -D-<br>galactopyranosyl                                                                         | [17,18]    |
| <i>Baseonema acuminatum</i> | Asclepiadaceae | Kaempferol 3-O-(6"-galloyl)- $\beta$ -D-<br>glucopyranoside                                                                                                                                                                                                                        | [19]       |

|                                 |                |                                                                                                                                                                                                                                                            |         |
|---------------------------------|----------------|------------------------------------------------------------------------------------------------------------------------------------------------------------------------------------------------------------------------------------------------------------|---------|
| <i>Bauhinia malabarica</i>      | Leguminosae    | Kaempferol and 6,8-di-C-methylkaempferol 3-methylether                                                                                                                                                                                                     | [20]    |
| <i>Bauhinia microstachya</i>    | Leguminosae    | Kaempferol 3-O-rhamnosyl                                                                                                                                                                                                                                   | [21]    |
| <i>Berchemia floribunda</i>     | Rhamnaceae     | Kaempferol and kaempferol 3-O- $\alpha$ -L-arabinofuranoside                                                                                                                                                                                               | [22]    |
| <i>Brassica campestris</i>      | Brassicaceae   | Kaempferol and kaempferol 3-O-hydroxyferuloylsophoroside-7-O-glucoside                                                                                                                                                                                     | [23]    |
| <i>Bunias orientalis</i>        | Brassicaceae   | kaempferol glycosides                                                                                                                                                                                                                                      | [24]    |
| <i>Bupleurum flavum</i>         | Apiaceae       | Kaempferol                                                                                                                                                                                                                                                 | [25]    |
| <i>Callistemon lanceolatus</i>  | Myrtaceae      | Kaempferol 3-O- $\beta$ -D-galacturonopyranoside                                                                                                                                                                                                           | [26]    |
| <i>Campanula alliariifolia</i>  | Campanulaceae  | Kaempferol 3-O-glucoside                                                                                                                                                                                                                                   | [27]    |
| <i>Canavalia gladiata</i>       | Leguminosae    | Kaempferol 3-O- $\beta$ -D-galactopyranosyl-7-O- $\alpha$ -L-rhamnopyranoside                                                                                                                                                                              | [28]    |
| <i>Carthamus lanatus</i>        | Asteraceae     | Kaempferol 3-O- $\beta$ -D-sophoroside                                                                                                                                                                                                                     | [29]    |
| <i>Cannabis sativa</i>          | Cannabaceae    | Kaempferol 3-O-sophoroside                                                                                                                                                                                                                                 | [30]    |
| <i>Cassia alata</i>             | Leguminosae    | Kaempferol 3-O-gentiobioside                                                                                                                                                                                                                               | [31,32] |
| <i>Cassia siamea</i>            | Leguminosae    | Kaempferol                                                                                                                                                                                                                                                 | [33]    |
| <i>Chuquiraga spinosa</i>       | Asteraceae     | Kaempferol 3-O-glucuronide, kaempferol 3-O-rutinoside and kaempferol 3-O-glucoside                                                                                                                                                                         | [34]    |
| <i>Cinnamomum mosmophloeum</i>  | Lauraceae      | kaempferol 3-O- $\beta$ -D-apiofuranosyl-(1 $\rightarrow$ 2)- $\alpha$ -L-arabinofuranosyl-7-O- $\alpha$ -L-rhamnopyranoside, Kaempferol 3-O- $\beta$ -D-glucopyranosyl-(1 $\rightarrow$ 4)- $\alpha$ -L-rhamnopyranosyl-7-O- $\alpha$ -L-rhamnopyranoside | [35]    |
| <i>Citrus aurantifolia</i>      | Rutaceae       | kaempferol 3-O- $\beta$ -D-glucopyranoside-6''-(3-hydroxy-3-methyl glutarate), Kaempferol 3-O- $\beta$ -rutinoside                                                                                                                                         | [36]    |
| <i>Cuscuta australis</i>        | Convolvulaceae | Kaempferol                                                                                                                                                                                                                                                 | [37]    |
| <i>Datura suaveolens</i>        | Solanaceae     | Kaempferol 3-O- $\alpha$ -L-arabinopyranosyl-7-O- $\beta$ -D-glucopyranoside and kaempferol 3-O- $\alpha$ -L-arabinopyranoside                                                                                                                             | [38]    |
| <i>Dendrophthoe falcata</i>     | Loranthaceae   | Kaempferol 3-O- $\alpha$ -L-rhamnopyranoside                                                                                                                                                                                                               | [39]    |
| <i>Diodia teres</i>             | Rubiaceae      | Kaempferol 3-O-rutinoside                                                                                                                                                                                                                                  | [40]    |
| <i>Dipladenia martiana</i>      | Apocynaceae    | Kaempferol                                                                                                                                                                                                                                                 | [41]    |
| <i>Dorycnium rectum</i>         | Leguminosae    | Kaempferol-3,7-O- $\alpha$ -di-rhamnopyranoside                                                                                                                                                                                                            | [42]    |
| <i>Dryopteris crassirhizoma</i> | Aspidiaceae    | Kaempferol glycosides                                                                                                                                                                                                                                      | [43]    |
| <i>Drabanemorosa</i>            | Brassicaceae   | Kaempferol glycosides                                                                                                                                                                                                                                      | [44]    |
| <i>Echites hirsute</i>          | Apocynaceae    | Kaempferol                                                                                                                                                                                                                                                 | [45]    |
| <i>Equisetum arvense</i>        | Equisetaceae   | Kaempferol 3-O-glucoside                                                                                                                                                                                                                                   | [46]    |
| <i>Equisetum myriochaetum</i>   | Equisetaceae   | Kaempferol glucosides                                                                                                                                                                                                                                      | [47]    |
| <i>Eruca sativa</i>             | Brassicaceae   | Kaempferol glucosides                                                                                                                                                                                                                                      | [48]    |
| <i>Eucalyptus occidentalis</i>  | Myrtaceae      | 6,8-di-C-methylkaempferol 3-methyl                                                                                                                                                                                                                         | [49]    |

|                                      |                  | ether                                                                                                                     |         |
|--------------------------------------|------------------|---------------------------------------------------------------------------------------------------------------------------|---------|
| <i>Euphorbia petiolata</i>           | Euphorbiaceae    | kaempferol 3-O-glucoside and kaempferol 3-O-rhamnoside                                                                    | [50]    |
| <i>Fagonia Arabica</i>               | Zygophyllaceae   | Kaempferol 7-O-rhamnoside                                                                                                 | [51]    |
| <i>Ficaria verna</i>                 | Ranunculaceae    | Kaempferol 3-O-β-D-(6"-L-rhamnopyranosyl)-glucopyranoside                                                                 | [52]    |
| <i>Foeniculum vulgare</i>            | Apiaceae         | kaempferol 3-O-glucoside and Kaempferol 3-O-rutinoside                                                                    | [53]    |
| <i>Frankenia laevis</i>              | Frankeniaceae    | Kaempferol 3,7-di-sodium sulphate                                                                                         | [54]    |
| <i>Geranium bellum</i>               | Geraniaceae      | Kaempferol 3-O-β-D-glucopyranoside                                                                                        | [55]    |
| <i>Ginkgo biloba</i>                 | Ginkgoaceae      | kaempferol 3-O-α-(6"-p-coumaroylglucosyl-β-1,4-rhamnoside), kaempferol 3-O-(2"-O-β-D-glucopyranosyl)-α-L-rhamnopyranoside | [56,57] |
| <i>Glycyrrhiza spp</i>               | Leguminosae      | Kaempferol 3-O-methyl ether                                                                                               | [58]    |
| <i>Grindelia robusta</i>             | Asteraceae       | 6-OH-kaempferol-3,6-dimethylether                                                                                         | [59]    |
| <i>Hedyotis diffusa</i>              | Rubiaceae        | kaempferol 3-O-[2-O-(6-O-E-feruloyl)-β-D-glucopyranosyl]-β-D-galactopyranoside                                            | [60]    |
| <i>Hippophae rhamnoides</i>          | Elaeagnaceae     | Kaempferol                                                                                                                | [61,62] |
| <i>Hydrangea macrophylla</i>         | Hydrangeaceae    | Kaempferol oligoglycosides                                                                                                | [62]    |
| <i>Impatiens textori</i>             | Balsaminaceae    | kaempferol 3-glucoside and kaempferol 3-rhamnosyldiglucoside                                                              | [63]    |
| <i>Indigofera suffruticosa</i>       | Leguminosae      | Kaempferol                                                                                                                | [64]    |
| <i>Ixeridium gracile</i>             | Asteraceae       | Kaempferol                                                                                                                | [65]    |
| <i>Kanahialaniflora</i>              | Asclepiadaceae   | kaempferol 3-O-(2,6-di-O-α-L-rhamnopyranosyl)-β-D-glucopyranoside                                                         | [66]    |
| <i>Koelreuteria paniculata</i>       | Sapindaceae      | Kaempferol 3-O-arabinopyranoside                                                                                          | [67]    |
| <i>Lamium album</i>                  | Lamiaceae        | Kaempferol 3-O-glucoside                                                                                                  | [68]    |
| <i>Laurus nobilis</i>                | Lauraceae        | kaempferol 3-O-α-L-(2"-Z-p-coumaroyl-4"-E-p-coumaroyl)-rhamnoside                                                         | [69]    |
| <i>Leonurus persicus</i>             | Lamiaceae        | Kaempferol 3-O-glucoside                                                                                                  | [70]    |
| <i>Licanialicaniaeflora</i>          | Chrysobalanaceae | Kaempferol 3-O-α-rhamnoside                                                                                               | [71]    |
| <i>Lonicera japonica</i>             | Caprifoliaceae   | Kaempferol 3-O-β-D-glucopyranoside                                                                                        | [72]    |
| <i>Machilus philippinensis</i>       | Lauraceae        | kaempferol 3-O-α-L-rhamnopyranoside 3"-E,4"-Z-di-p-coumaroic acid ester                                                   | [73]    |
| <i>Malva crispa</i>                  | Malvaceae        | Kaempferol glycosides                                                                                                     | [74]    |
| <i>Meconopsis spp</i>                | Papaveraceae     | kaempferol 3-O-(6-O-β-D-glucopyranosyl)-β-D-galactopyranoside                                                             | [75]    |
| <i>Melastoma malabathricum</i>       | Melastomataceae  | Kaempferol 3-O-(2",6"-di-O-p-trans-coumaroyl)-β-glucoside                                                                 | [76]    |
| <i>Mitracarpus scaber</i>            | Rubiaceae        | Kaempferol 3-O-rutinoside                                                                                                 | [77]    |
| <i>Morinda citrifolia</i>            | Rubiaceae        | Kaempferol                                                                                                                | [78]    |
| <i>Neocheiropteris palmatopedata</i> | Polypodiaceae    | Kaempferol glycosides                                                                                                     | [7]     |
| <i>Nephelium lappaceum</i>           | Sapindaceae      | Kaempferol 3-O-β-D-glucopyranoside-7-                                                                                     | [79]    |

|                                 |                  |                                                                                                                                                                                         |       |
|---------------------------------|------------------|-----------------------------------------------------------------------------------------------------------------------------------------------------------------------------------------|-------|
|                                 |                  | O- $\alpha$ -L-rhamnopyranoside                                                                                                                                                         |       |
| <i>Nicotiana tabacum</i>        | Solanaceae       | Kaempferol 3-rutinoside                                                                                                                                                                 | [80]  |
| <i>Ochnabeddomei</i>            | Ochnaceae        | kaempferol 3-O-rhamnoside and<br>kaempferol 3-O-glucoside                                                                                                                               | [81]  |
| <i>Olea europaea</i>            | Oleaceae         | Kaempferol                                                                                                                                                                              | [82]  |
| <i>Origanumdictamnus</i>        | Lamiaceae        | Kaempferol                                                                                                                                                                              | [83]  |
| <i>Oxytropis falcate</i>        | Leguminosae      | Kaempferol                                                                                                                                                                              | [84]  |
| <i>Papaver nudicaule</i>        | Papaveraceae     | kaempferol 3-O- $\beta$ -sophoroside-7-O- $\beta$ -<br>glucoside and other kaempferol<br>derivatives                                                                                    | [85]  |
| <i>Pedilanthustithymaloides</i> | Euphorbiaceae    | Kaempferol 3-O- $\beta$ -D-glucopyranoside-<br>6''-(3-hydroxy-3-methylglutarate)                                                                                                        | [86]  |
| <i>Peumusboldus</i>             | Monimiaceae      | Kaempferol glycosides                                                                                                                                                                   | [87]  |
| <i>Phellodendronamurense</i>    | Rutaceae         | Kaempferol 3-O- $\beta$ -D-glucoside                                                                                                                                                    | [88]  |
| <i>Phlomiscaucasica</i>         | Lamiaceae        | Kaempferol 3-O-glucoside                                                                                                                                                                | [89]  |
| <i>Pinus densiflora</i>         | Pinaceae         | Kaempferol 3-O- $\beta$ -D-glucoside and 6-C-<br>methyl kaempferol 3-O- $\beta$ -D-glucoside                                                                                            | [90]  |
| <i>Pisum sativum</i>            | Leguminosae      | Kaempferol 3-sophorotrioxide                                                                                                                                                            | [91]  |
| <i>Polygala japonica</i>        | Polygalaceae     | Kaempferol 3-gentiobioside                                                                                                                                                              | [92]  |
| <i>Prunus amygdalus</i>         | Rosaceae         | Kaempferol 3-O- $\alpha$ -L-rhamnopyranosyl-<br>(1 $\rightarrow$ 6)- $\beta$ -D-glucopyranoside                                                                                         | [93]  |
| <i>Prunus serrulata</i>         | Rosaceae         | kaempferol 3-O- $\beta$ -xylopyranoside,<br>kaempferol 3-O- $\beta$ -glucopyranoside                                                                                                    | [94]  |
| <i>Quercus dentate</i>          | Fagaceae         | kaempferol 3-O-(6''-trans-p-coumaroyl)-<br>$\beta$ -D-glucopyranoside, kaempferol 3-O-<br>(2'',4''-di-acetyl-3''-cis-p-coumaroyl-6''-<br>trans-p-coumaroyl)- $\beta$ -D-glucopyranoside | [95]  |
| <i>Randia Formosa</i>           | Rubiaceae        | Kaempferol 3-O-rutinoside                                                                                                                                                               | [96]  |
| <i>Rhamnusnipalensis</i>        | Rhamnaceae       | Kaempferol 4'-methylether                                                                                                                                                               | [97]  |
| <i>Rhamnusprocumbens</i>        | Rhamnaceae       | Kaempferol                                                                                                                                                                              | [98]  |
| <i>Rosa canina</i>              | Rosaceae         | Kaempferol 3-O- $\beta$ -D-(6''-E-p-coumaroyl)-<br>glucopyranoside                                                                                                                      | [99]  |
| <i>Rosmarinus officinalis</i>   | Lamiaceae        | Kaempferol                                                                                                                                                                              | [100] |
| <i>Rubussanctus</i>             | Rosaceae         | kaempferol 3-O- $\beta$ -D-galactosides ,<br>kaempferol 3-O- $\beta$ -L-arabinopyranoside                                                                                               | [101] |
| <i>Sageretiatheezans</i>        | Rhamnaceae       | Kaempferol 3-O- $\alpha$ -L-rhamnopyranoside                                                                                                                                            | [102] |
| <i>Sambucus nigra</i>           | Caprifoliaceae   | Kaempferol                                                                                                                                                                              | [103] |
| <i>Scabiosa hymettia</i>        | Dipsacaceae      | kaempferol 3-O- $\beta$ -D-glucopyranoside,<br>Kaempferol 3-O-[3- O-acetyl-6-O-(E)-p-<br>coumaroyl]- $\beta$ -D-glucopyranoside                                                         | [104] |
| <i>Scopoliacaucasica</i>        | Solanaceae       | kaempferol 3-O-(2-glucosyl)-galactoside                                                                                                                                                 | [105] |
| <i>Scopolialurida</i>           | Solanaceae       | Kaempferol glycosides                                                                                                                                                                   | [106] |
| <i>Scrophulariaailtvensis</i>   | Scrophulariaceae | Kaempferol 3-O-rutinoside                                                                                                                                                               | [107] |
| <i>Senecio scandens</i>         | Asteraceae       | Kaempferol 3-O-rhamnoside                                                                                                                                                               | [108] |
| <i>Solanum nigrum</i>           | Solanaceae       | Kaempferol                                                                                                                                                                              | [109] |
| <i>Solidagoaltissima</i>        | Asteraceae       | Kaempferol 3-O- $\beta$ -D-apiofuranosyl-<br>(1 $\rightarrow$ 6)- $\beta$ -D-glucopyranoside                                                                                            | [110] |

|                                  |               |                                                                                                                                            |       |
|----------------------------------|---------------|--------------------------------------------------------------------------------------------------------------------------------------------|-------|
| <i>Spiraea canescens</i>         | Rosaceae      | 6'-O-(4''-methoxy-trans-cinnamoyl)-<br>kaempferol-3-β-D-glucopyranoside                                                                    | [111] |
| <i>Syzygium aromaticum</i>       | Myrtaceae     | Kaempferol                                                                                                                                 | [112] |
| <i>Tamarix nilotica</i>          | Tamaricaceae  | Kaempferol 4'-methyl ether                                                                                                                 | [113] |
| <i>Terminalia myriocarpa</i>     | Combretaceae  | Kaempferol 3-O-β-D-rutinoside                                                                                                              | [114] |
| <i>Thevetia peruviana</i>        | Apocynaceae   | Kaempferol 3-glucosyl-(1→4)-[6'''-<br>sinapoylglucosyl]-(1→2)-galactoside                                                                  | [115] |
| <i>Trifolium alexandrinum</i>    | Leguminosae   | Kaempferol                                                                                                                                 | [116] |
| <i>Trigonella foenum-graecum</i> | Leguminosae   | kaempferol 3-O-β-D-glucosyl-(1→2)-(6''-<br>O-acetyl)-β-D-galactoside-7-O-β-D-<br>glucoside                                                 | [117] |
| <i>Ullucus tuberosus</i>         | Basellaceae   | Kaempferol 3-O-(2'',6''-di-O-α-L-<br>rhamnopyranosyl)-β-D-glucopyranoside                                                                  | [118] |
| <i>Vaccinium vitis-idaea</i>     | Ericaceae     | kaempferol 3-O-[4''-(3-hydroxy-3-<br>methylglutaroyl)]-α-rhamnose,                                                                         | [119] |
| <i>Vahliacapensis</i>            | Vahliaceae    | Kaempferol-pentoside                                                                                                                       | [120] |
| <i>Vernonia ferruginea</i>       | Asteraceae    | Kaempferol                                                                                                                                 | [121] |
| <i>Vernonia travancorica</i>     | Asteraceae    | Kaempferol 3-O-β-D-apiofuranosyl-<br>(1→4)-β-D-glucopyranoside                                                                             | [122] |
| <i>Vinca minor</i>               | Apocynaceae   | 4'-methoxykaempferol, Kaempferol 3-O-<br>β-[β-(6'''-acetyl)-D-glucopyranosyl-<br>(1→2)]-D-glucopyranosyl                                   | [123] |
| <i>Vitis vinifera</i>            | Vitaceae      | Kaempferol glycosides                                                                                                                      | [124] |
| <i>Waltheria indica</i>          | Sterculiaceae | kaempferol 3-glucoside, kaempferol 3-<br>glucuronide                                                                                       | [125] |
| <i>Warburgia ugandensis</i>      | Canellaceae   | Kaempferol 3-O-β-D-(6''-O-<br>coumaroyl)glucopyranoside                                                                                    | [126] |
| <i>Zelkova oregoniana</i>        | Ulmaceae      | kaempferol 3-rhamnoside, kaempferol 3-<br>glucoside, kaempferol 3-<br>arabinoside, Kaempferol 3-O-α-<br>rhamnoside-7,4'-di-O-β-galactoside | [127] |
| <i>Zollernia ilicifolia</i>      | Leguminosae   | Kaempferol                                                                                                                                 | [128] |
|                                  |               | Kaempferol 3-O-α-L-rhamnopyranosyl-<br>(1→2)-O-[α-L-rhamnopyranosyl-(1→6)]-<br>O-β-D-galactopyranoside-7-O-α-L-<br>rhamnopyranoside        |       |

## References

1. Matławska, I.; Sikorska, M. Flavonoids from *Abutilon theophrasti* flowers. *Acta Pol. Pharm.* 2005, 62, 135–139.
2. Backhouse, N.; Delporte, C.; Negrete, R.; Feliciano, S.S.; López-Pérez, J. Bioactive phenolic derivatives from *Acaenasplendens* methanol extract. *Phytother. Res.* 2002, 16, 562–566.
3. Han, J.-T.; Bang, M.-H.; Chun, O.-K.; Kim, D.-O.; Lee, C.-Y.; Baek, N.-I. Flavonol glycosides from the aerial parts of *Aceriphyllumrossii* and their antioxidant activities. *Arch. Pharmacol Res.* 2004, 27, 390–395.
4. Singh, R.; Singh, B.; Singh, S.; Kumar, N.; Kumar, S.; Arora, S. Anti-free radical activities of kaempferol isolated from *Acacia nilotica* (L.) Willd. Ex. Del. *Toxicol. Vitro.* 2008, 22, 1965–1970, doi:10.1016/j.tiv.2008.08.007.
5. Braca, A.; Fico, G.; Morelli, I.; De Simone, F.; Tomè, F.; De Tommasi, N. Antioxidant and free radical scavenging activity of flavonol glycosides from different *Aconitum* species. *J. Ethnopharmacol.* 2003, 86, 63–67, doi:10.1016/s0378-8741(03)00043-6.
6. Fico, G.; Braca, A.; Bilia, A.R.; Tomè, F.; Morelli, I. Flavonol Glycosides from the Flowers of *Aconitumpaniculatum*. *J. Nat. Prod.* 2000, 63, 1563–1565, doi:10.1021/np000246h.
7. Xin, H.L.; Wu, Y.C.; Su, Y.H.; Sheng, J.Y.; Ling, C.Q. Novel Flavonoids from the Leaves of *Actinidia valvata* Dunn: Structural Elucidation and Antioxidant Activity. *Planta Med.* 2011, 77, 70–73, doi:10.1055/s-0030-1250113.
8. Fico, G.; Braca, A.; De Tommasi, N.; Tomè, F.; Morelli, I. Flavonoids from *Aconitum napellus* subsp. *neomontanum*. *Phytochemistry* 2001, 57, 543–546, doi:10.1016/s0031-9422(01)00102-9.
9. Itoh, A.; Tanahashi, T.; Nagakura, N.; Takenaka, Y.; Chen, C.-C.; Pelletier, J. Flavonoid Glycosides from *Adinaracemosaa* and Their Inhibitory Activities on Eukaryotic Protein Synthesis. *J. Nat. Prod.* 2004, 67, 427–431, doi:10.1021/np030440e.
10. Rodríguez Galdón, B.; Rodríguez Rodríguez, E.M.; Díaz Romero, C. Flavonoids in Onion Cultivars (*Allium cepa*L.). *J. Food Sci.* 2008, 73, C599–C605, doi:10.1111/j.1750-3841.2008.00903.x.
11. Fattorusso, E.; Lanzotti, V.; Tagliatalata-Scafati, O.; Cicala, C. The flavonoids of leek, *Allium porrum*. *Phytochemistry* 2001, 57, 565–569, doi:10.1016/s0031-9422(01)00039-5.
12. Keyhanian, S.; Stahl-Biskup, E. Phenolic Constituents in Dried Flowers of *Aloe vera* (*Aloe barbadensis*) and their in vitro Antioxidative Capacity. *Planta Med.* 2007, 73, 599–602, doi:10.1055/s-2007-967202.
13. Papież, M.; Gancarczyk, M.; Bilińska, B. The compounds from the hollyhock extract (*Althaea rosea* Cav. var. *nigra*) affect the aromatization in rat testicular cells in vivo and in vitro. *Folia Histochem. Cytobiol.* 2002, 40, 353–359.
14. Habbu, P.; Mahadevan, K.; Shastry, R.; Manjunatha, H. Antimicrobial activity of flavanoid sulphates and other fractions of *Argyrea speciosa* (Burm. f) Boj. *Indian J. Exp. Biol.* 2009, 47, 121–128.
15. Grundmann, O.; Nakajima, J.-I.; Kamata, K.; Seo, S.; Butterweck, V. Kaempferol from the leaves of *Apocynum venetum* possesses anxiolytic activities in the elevated plus maze test in mice. *Phytomedicine* 2009, 16, 295–302.
16. Xiong, Q.; Fan, W.; Tezuka, Y.; Adnyana, I.K.; Stampoulis, P.; Hattori, M.; Namba, T.; Kadota, S. Hepatoprotective effect of *Apocynum venetum* and its active constituents. *Planta Med.* 2000, 66, 127–133.
17. Semmar, N.; Fenet, B.; Lacaille-Dubois, M.-A.; Gluchoff-Fiasson, K.; Chemli, R.; Jay, M. Two New Glycosides from *Astragalus caprinus*. *J. Nat. Prod.* 2001, 64, 656–658, doi:10.1021/np0005311.
18. Semmar, N.; Fenet, B.; Gluchoff-Fiasson, K.; Hasan, A.; Jay, M. Four New Flavonol Glycosides from the Leaves of *Astragalus caprinus*. *J. Nat. Prod.* 2002, 65, 576–579.
19. De Leo, M.; Braca, A.; De Tommasi, N.; Norscia, I.; Morelli, I.; Battinelli, L.; Mazzanti, G. Phenolic compounds from *Baseonema acuminatum* leaves: Isolation and antimicrobial activity. *Planta Med.* 2004, 70, 841–846.
20. Kaewamatawong, R.; Kitajima, M.; Kogure, N.; Takayama, H. Flavonols from *Bauhinia malabarica*. *J. Nat. Med.* 2008, 62, 364–365, doi:10.1007/s11418-008-0249-9.
21. Meyre-Silva, C.; Yunes, R.A.; Monache, F.; Santos, A.; Schmeling, L.O.; de Maria Gadotti, V.; Liz, F.; Cechinel-Filho, V. Phytochemical and pharmacological analysis of *Bauhinia microstachya* (Raddi) Macbr. (Leguminosae). *Z. Nat. C* 2001, 56, 939–942.
22. Wang, Y.F.; Cao, J.X.; Efferth, T.; Lai, G.F.; Luo, S.D. Cytotoxic and New Tetralone Derivatives from *Berchemia floribunda* (Wall.) Brongn. *Chem. Biodivers.* 2006, 3, 646–653, doi:10.1002/cbdv.200690067.

23. Harbaum, B.; Hubbermann, E.M.; Wolff, C.; Herges, R.; Zhu, Z.; Schwarz, K. Identification of Flavonoids and Hydroxycinnamic Acids in Pak Choi Varieties (*Brassica campestris* L. ssp. *chinensis* var. *communis*) by HPLC–ESI–MS and NMR and Their Quantification by HPLC–DAD. *J. Agric. Food Chem.* **2007**, *55*, 8251–8260, doi:10.1021/jf071314+.
24. Bennett, R.N.; Rosa, E.A.; Mellon, F.A.; Kroon, P.A. Ontogenic profiling of glucosinolates, flavonoids, and other secondary metabolites in *Eruca sativa* (salad rocket), *Diplotaxis erucoides* (wall rocket), *Diplotaxis tenuifolia* (wild rocket), and *Bunias orientalis* (Turkish rocket). *J. Agric. Food Chem.* **2006**, *54*, 4005–4015.
25. Pistelli, L.; Noccioli, C.; Giachi, I.; Dimitrova, B.; Gevrenova, R.; Morelli, I.; Potenza, D. Lupane-triterpenes from *Bupleurum flavum*. *Nat. Prod. Res.* **2005**, *19*, 783–788, doi:10.1080/14786410500045119.
26. Mahmoud, I.; Moharram, F.; Marzouk, M.; Linscheid, M.; Saleh, M. Polyphenolic constituents of *Callistemon lanceolatus* leaves. *Die Pharm.* **2002**, *57*, 494–496.
27. Dumlu, M.U.; Gurkan, E.; Tuzlaci, E. Chemical composition and antioxidant activity of *Campanula alliariifolia*. *Nat. Prod. Res.* **2008**, *22*, 477–482, doi:10.1080/14786410701640429.
28. Murakami, T.; Kohno, K.; Kishi, A.; Matsuda, H.; Yoshikawa, M. Medicinal foodstuffs. XIX. Absolute stereostructures of canavalioid, a new Ent-kaurane-type diterpene glycoside, and gladiatolides A1, A2, A3, B1, B2, B3, C1, and C2, new acylated flavonol glycosides, from sword bean, the seeds of *Canavalia gladiata*. *Chem. Pharm. Bull.* **2000**, *48*, 1673–1680, doi:10.1248/cpb.48.1673.
29. Taskova, R.; Mitova, M.; Mikhova, B.; Duddeck, H. Bioactive phenolics from *Carthamus lanatus*, L.Z. *Nat. C* **2003**, *58*, 704–707.
30. Ross, S.A.; ElSohly, M.A.; Sultana, G.N.; Mehmedic, Z.; Hossain, C.F.; Chandra, S. Flavonoid glycosides and cannabinoids from the pollen of *Cannabis sativa* L. *Phytochem. Anal.* **2005**, *16*, 45–48, doi:10.1002/pca.809.
31. Moriyama, H.; Iizuka, T.; Nagai, M. A Stabilized Flavonoid Glycoside in Heat-Treated *Cassia alata* Leaves and Its Structural Elucidation. *Yakugaku Zasshi* **2001**, *121*, 817–820, doi:10.1248/yakushi.121.817.
32. Moriyama, H.; Iizuka, T.; Nagai, M.; Miyataka, H.; Satoh, T. Anti-inflammatory activity of heat-treated *Cassia alata* leaf extract and its flavonoid glycoside. *Yakugaku Zasshi* **2003**, *123*, 607–611, doi:10.1248/yakushi.123.607.
33. Ntandou, G.N.; Banzouzi, J.; Mbatchi, B.; Elion-Itou, R.; Etou-Ossibi, A.; Ramos, S.; Benoit-Vical, F.; Abena, A.; Ouamba, J. Analgesic and anti-inflammatory effects of *Cassia siamea* Lam. stem bark extracts. *J. Ethnopharmacol.* **2010**, *127*, 108–111, doi:10.1016/j.jep.2009.09.040.
34. Landa, A.; Casado, R.; Calvo, M.I. Identification and quantification of flavonoids from *Chuquiraga spinosa* (Asteraceae). *Nat. Prod. Commun.* **2009**, *4*, 1934578X0900401008, doi:10.1177/1934578x0900401008.
35. Fang, S.-H.; Rao, Y.K.; Tzeng, Y.-M. Inhibitory effects of flavonol glycosides from *Cinnamomum mosmophloeum* on inflammatory mediators in LPS/IFN- $\gamma$ -activated murine macrophages. *Bioorg. Med. Chem.* **2005**, *13*, 2381–2388.
36. Berhow, M.A.; Bennett, R.D.; Poling, S.M.; Vannier, S.; Hidaka, T.; Omura, M. Acylated flavonoids in callus cultures of *Citrus aurantifolia*. *Phytochemistry* **1994**, *36*, 1225–1227, doi:10.1016/s0031-9422(00)89641-7.
37. Ye, M.; Yan, Y.; Guo, D.-A. Characterization of phenolic compounds in the Chinese herbal drug Tu-Si-Zi by liquid chromatography coupled to electrospray ionization mass spectrometry. *Rapid Commun. Mass Spectrom.* **2005**, *19*, 1469–1484, doi:10.1002/rcm.1944.
38. Sajeli Begum, A.; Sahai, M.; Fujimoto, Y.; Asai, K.; Schneider, K.; Nicholson, G.; Suessmuth, R. A new kaempferol diglycoside from *Datura suaveolens* Humb. & Bonpl. ex Willd. *Nat. Prod. Res.* **2006**, *20*, 1231–1236.
39. Mallavadhani, U.V.; Narasimhan, K.; Sudhakar, A.V.S.; Mahapatra, A.; Li, W.; van Breemen, R.B. Three new pentacyclic triterpenes and some flavonoids from the fruits of an Indian Ayurvedic plant *Dendrophthoe falcata* and their estrogen receptor binding activity. *Chem. Pharm. Bull.* **2006**, *54*, 740–744.
40. Cordell, G.; Lyon, R.; Fong, H.; Benoit, P.; Farnsworth, N. Biological and phytochemical investigations of *Dianthus barbatus* cv. “China Doll” (Caryophyllaceae). *Lloydia* **1977**, *40*, 361–363.
41. de Cranchi, M.G.; Carvalho Cranchi, D.; Kingston, D.G.; Werle, A.A. Proposed active constituents of *Dipladenia martiana*. *Phytother. Res.* **2001**, *15*, 715–717, doi:10.1002/ptr.865.
42. Moreno, A.; Cordero, C.M.; Iglesias-Guerra, F.; Toro, M.V. Flavonoids from *Dorycnium rectum*. *Biochem. Syst. Ecol.* **2002**, *30*, 73–74, doi:10.1016/s0305-1978(01)00070-9.

43. Min, B.-S.; Tomiyama, M.; Nakamura, N.; Hattori, M. Kaempferol Acetylramnosides from the Rhizome of *Dryopteris crassirhizoma* and Their Inhibitory Effects on Three Different Activities of Human Immunodeficiency Virus-1 Reverse Transcriptase. *Chem. Pharm. Bull.* **2001**, *49*, 546–550, doi:10.1248/cpb.49.546.
44. Moon, S.-S.; Rahman, A.A.; Manir, M.; Ahamed, V.J. Kaempferol glycosides and cardenolide glycosides, cytotoxic constituents from the seeds of *Drabanemorosa* (Brassicaceae). *Arch. Pharmacol Res.* **2010**, *33*, 1169–1173.
45. Chien, M.; Svoboda, G.; Schiff, Jr, P.; Slatkin, D.; Knapp, J. Chemical constituents of *Echiteshirsuta* (Apocynaceae). *J. Pharm. Sci.* **1979**, *68*, 247–249.
46. Oh, H.; Kim, D.-H.; Cho, J.-H.; Kim, Y.-C. Hepatoprotective and free radical scavenging activities of phenolic petrosins and flavonoids isolated from *Equisetum arvense*. *J. Ethnopharmacol.* **2004**, *95*, 421–424, doi:10.1016/j.jep.2004.08.015.
47. Cetto, A.A.; Wiedenfeld, H.; Revilla, M.C.; Sergio, I.A. Hypoglycemic effect of *Equisetum myriochaetum* aerial parts on streptozotocin diabetic rats. *J. Ethnopharmacol.* **2000**, *72*, 129–133, doi:10.1016/s0378-8741(00)00218-x.
48. Benyahia, S.; Benayache, S.; Benayache, F.; Quintana, J.; López, M.; León, F.; Hernández, J.C.; Estévez, F.; Bermejo, J. Isolation from eucalyptus occidentalis and identification of a new Kaempferol derivative that induces apoptosis in human myeloid leukemia cells. *J. Nat. Prod.* **2004**, *67*, 527–531.
49. Lee, M.K.; Jeon, H.Y.; Lee, K.Y.; Kim, S.H.; Ma, C.J.; Sung, S.H.; Lee, H.-S.; Park, M.J.; Kim, Y. Inhibitory Constituents of *Euscaphis japonica* on Lipopolysaccharide-Induced Nitric Oxide Production in BV2 Microglia. *Planta Med.* **2007**, *73*, 782–786, doi:10.1055/s-2007-981551.
50. El-Wakil, E.A. Phytochemical and molluscicidal investigations of *Fagonia arabica*. *Z. Nat. C* **2007**, *62*, 661–667, doi:10.1515/znc-2007-9-1006.
51. Tomczyk, M.; Gudej, J.; Sochacki, M. Flavonoids from *Ficariaverna* Hud. *Z. Nat. C* **2002**, *57*, 440–444.
52. Parejo, I.; Viladomat, F.; Bastida, J.; Schmeda-Hirschmann, G.; Burillo, J.; Codina, C. Bioguided Isolation and Identification of the Nonvolatile Antioxidant Compounds from Fennel (*Foeniculum vulgare* Mill.) Waste. *J. Agric. Food Chem.* **2004**, *52*, 1890–1897, doi:10.1021/jf030717g.
53. Hussein, S.A.M. Flavonoid and methoxyellagic acid sodium sulphates from *Frankenia laevis* L. *Die Pharm.* **2004**, *59*, 484–487.
54. Gayosso-De-Lucio, J.A.; Torres-Valencia, J.M.; Cerda-García-Rojas, C.M.; Joseph-Nathan, P. Ellagitannins from *Geranium potentillaefolium* and *G. bellum*. *Nat. Prod. Commun.* **2010**, *5*, 1934578X1000500407, doi:10.1177/1934578x1000500407.
55. Lee, H.-S.; Kim, M.-J. Selective responses of three *Ginkgo biloba* leaf-derived constituents on human intestinal bacteria. *J. Agric. Food Chem.* **2002**, *50*, 1840–1844, doi:10.1021/jf011140a.
56. Kwon, S.H.; Nam, J.I.; Kim, S.H.; Kim, J.H.; Yoon, J.H.; Kim, K.S. Kaempferol and quercetin, essential ingredients in *Ginkgo biloba* extract, inhibit interleukin-1 $\beta$ -induced MUC5AC gene expression in human airway epithelial cells. *Phytother. Res.* **2009**, *23*, 1708–1712, doi:10.1002/ptr.2817.
57. Hatano, T.; Yasuhara, T.; Fukuda, T.; Noro, T.; Okuda, T. Phenolic constituents of licorice. II. Structures of licopteranocoumarin, licoaryl coumarin and glisoflavone, and inhibitory effects of licorice phenolics on xanthine oxidase. *Chem. Pharm. Bull.* **1989**, *37*, 3005–3009, doi:10.1248/cpb.37.3005.
58. Krenn, L.; Wollenweber, E.; Steyrlleuthner, K.; Görick, C.; Melzig, M.F. Contribution of methylated exudate flavonoids to the anti-inflammatory activity of *Grindelia robusta*. *Fitoterapia* **2009**, *80*, 267–269, doi:10.1016/j.fitote.2009.03.001.
59. Kim, Y.; Park, E.J.; Kim, J.; Kim, Y.-B.; Kim, S.R.; Kim, Y.C. Neuroprotective constituents from *Hedyotis diffusa*. *J. Nat. Prod.* **2001**, *64*, 75–78.
60. Sharma, U.K.; Sharma, K.; Sharma, N.; Sharma, A.; Singh, H.P.; Sinha, A.K. Microwave-assisted efficient extraction of different parts of *Hippophae rhamnoides* for the comparative evaluation of antioxidant activity and quantification of its phenolic constituents by reverse-phase high-performance liquid chromatography (RP-HPLC). *J. Agric. Food Chem.* **2008**, *56*, 374–379.
61. Yoshikawa, M.; Matsuda, H.; Shimoda, H.; Shimada, H.; Harada, E.; Naitoh, Y.; Miki, A.; Yamahara, J.; Murakami, N. Development of bioactive functions in *hydrangea edulis* folium. V. On the antiallergic and antimicrobial principles of *hydrangea edulis* folium. (2). Thunberginols C, D, and E, thunberginol G 3'-O-



- glucoside,(-)-hydrangenol 4'-o-glucoside, and (+)-hydrangenol 4'-O-glucoside. *Chem. Pharm. Bull.* **1996**, *44*, 1440–1447.
62. Ueda, Y.; Oku, H.; Inuma, M.; Ishiguro, K. Effects on Blood Pressure Decrease in Response to PAF of *Impatiens textori* MIQ. *Biol. Pharm. Bull.* **2003**, *26*, 1505–1507.
  63. Calvo, T.R.; Cardoso, C.R.P.; da Silva Moura, A.C.; dos Santos, L.C.; Colus, I.M.S.; Vilegas, W.; Varanda, E.A. Mutagenic activity of *Indigoferatruxillensis* and *I. suffruticosa* aerial parts. *Evid. Based Complement. Altern. Med.* **2011**, *2011*, 323276.
  64. Zhang, Y.; Zhao, L.; Shi, Y.-P. Separation and determination of flavonoids in *Ixeridium gracile* by capillary electrophoresis. *J. Chromatogr. Sci.* **2007**, *45*, 600–604, doi:10.1093/chromsci/45.9.600.
  65. Clarkson, C.; Stærk, D.; Hansen, S.H.; Jaroszewski, J.W. Hyphenation of Solid-Phase Extraction with Liquid Chromatography and Nuclear Magnetic Resonance: Application of HPLC-DAD-SPE-NMR to Identification of Constituents of *Kanahialaniflora*. *Anal. Chem.* **2005**, *77*, 3547–3553, doi:10.1021/ac050212k.
  66. Lin, W.-H.; Deng, Z.-W.; Lei, H.-M.; Fu, H.-Z.; Li, J. Polyphenolic compounds from the leaves of *Koelreuteriapaniculata* Laxm. *J. Asian Nat. Prod. Res.* **2002**, *4*, 287–295.
  67. Budzianowski, J.; Skrzypczak, L. Phenylpropanoid esters from *Lamium album* flowers. *Phytochemistry* **1995**, *38*, 997–1001, doi:10.1016/0031-9422(94)00727-b.
  68. Otsuka, N.; Liu, M.-H.; Shiota, S.; Ogawa, W.; Kuroda, T.; Hatano, T.; Tsuchiya, T. Anti-methicillin resistant *Staphylococcus aureus* (MRSA) compounds isolated from *Laurus nobilis*. *Biol. Pharm. Bull.* **2008**, *31*, 1794–1797, doi:10.1248/bpb.31.1794.
  69. Tasdemir, D.; Scapozza, L.; Zerbe, O.; Linden, A.; Calis, I.; Sticher, O. Iridoid Glycosides of *Leonurus persicus*. *J. Nat. Prod.* **1999**, *62*, 811–816, doi:10.1021/np980376e.
  70. Braca, A.; Sortino, C.; Politi, M.; Morelli, I.; Mendez, J. Antioxidant activity of flavonoids from *Licanialicaniaeflora*. *J. Ethnopharmacol.* **2002**, *79*, 379–381.
  71. Choi, C.-W.; Jung, H.A.; Kang, S.S.; Choi, J.S. Antioxidant constituents and a new triterpenoid glycoside from *FlosLonicerae*. *Arch. Pharmacol Res.* **2007**, *30*, 1–7, doi:10.1007/bf02977770.
  72. Lee, S.-S.; Lin, H.-C.; Chen, C.-K. Acylated flavonolmonorhamnosides,  $\alpha$ -glucosidase inhibitors, from *Machilus philippinensis*. *Phytochemistry* **2008**, *69*, 2347–2353.
  73. Matławska, I.; Sikorska, M. Flavonoids from flowers of *Malva crispa* L. (Malvaceae). *Acta Pol. Pharm.* **2004**, *61*, 65–68.
  74. Tanaka, M.; Fujimori, T.; Uchida, I.; Yamaguchi, S.; Takeda, K. A malonylated anthocyanin and flavonols in blue *Meconopsis* flowers. *Phytochemistry* **2001**, *56*, 373–376, doi:10.1016/s0031-9422(00)00357-5.
  75. Sirat, H.M.; Susanti, D.; Ahmad, F.; Takayama, H.; Kitajima, M. Amides, triterpene and flavonoids from the leaves of *Melastomamalabathricum* L. *J. Nat. Med.* **2010**, *64*, 492–495.
  76. Bisignano, G.; Sanogo, R.; Marino, A.; Aquino, R.; 'angelo, V.; Germano, M.; De Pasquale, R.; Pizza, C. Antimicrobial activity of *Mitracarpusscaber* extract and isolated constituents. *Lett. Appl. Microbiol.* **2000**, *30*, 105–108.
  77. Kim, S.Y.; Gao, J.J.; Lee, W.-C.; Ryu, K.S.; Lee, K.R.; Kim, Y.C. Antioxidative flavonoids from the leaves of *Morus alba*. *Arch. Pharmacol Res.* **1999**, *22*, 81–85, doi:10.1007/bf02976442.
  78. Ragasa, C.Y.; de Luna, R.D.; Cruz, W.C.; Rideout, J.A. Monoterpene Lactones from the Seeds of *Nephelium lappaceum*. *J. Nat. Prod.* **2005**, *68*, 1394–1396.
  79. Yang, J.-H.; Kondratyuk, T.P.; Marler, L.E.; Qiu, X.; Choi, Y.; Cao, H.; Yu, R.; Sturdy, M.; Pegan, S.; Liu, Y. Isolation and evaluation of kaempferol glycosides from the fern *Neocheiropterispalmatopedata*. *Phytochemistry* **2010**, *71*, 641–647.
  80. Pang, T.; Yuan, Z.; Dai, Y.; Wang, C.; Yang, J.; Peng, L.; Xu, G. Identification and determination of glycosides in tobacco leaves by liquid chromatography with atmospheric pressure chemical ionization tandem mass spectrometry. *J. Sep. Sci.* **2007**, *30*, 289–296, doi:10.1002/jssc.200600236.
  81. Jayaprakasam, B.; Damu, A.; Rao, K.; Gunasekar, D.; Blond, A.; Bodo, B. 7-O-Methyltetrahydrochonaflavone, a new biflavanone from *Ochnabeddomei*. *J. Nat. Prod.* **2000**, *63*, 507–508.

82. De Laurentis, N.; Stefanizzi, L.; Milillo, M.; Tantillo, G. Flavonoids from leaves of *Olea europaea* L. cultivars. *Ann. Pharm. Françaises* **1998**, *56*, 268.
83. Chatzopoulou, A.; Karioti, A.; Gousiadou, C.; Lax Vivancos, V.; Kyriazopoulos, P.; Golegou, S.; Skaltsa, H. Depsides and other polar constituents from *Origanum dictamnus* L. and their in vitro antimicrobial activity in clinical strains. *J. Agric. Food Chem.* **2010**, *58*, 6064–6068.
84. Jiang, H.; Zhan, W.; Liu, X.; Jiang, S. Antioxidant activities of extracts and flavonoid compounds from *Oxytropis falcata* Bunge. *Nat. Prod. Res.* **2008**, *22*, 1650–1656, doi:10.1080/14786410701875686.
85. Schliemann, W.; Schneider, B.; Wray, V.; Schmidt, J.; Nimtz, M.; Porzel, A.; Böhm, H. Flavonols and an indole alkaloid skeleton bearing identical acylated glycosidic groups from yellow petals of *Papaver nudicaule*. *Phytochemistry* **2006**, *67*, 191–201, doi:10.1016/j.phytochem.2005.11.002.
86. Abreu, P.M.; Matthew, S.; González, T.; Vanickova, L.; Costa, D.; Gomes, A.; Segundo, M.A.; Fernandes, E. Isolation and identification of antioxidants from *Pedilanthus thymaloides*. *J. Nat. Med.* **2008**, *62*, 67–70.
87. Simirgiotis, M.J.; Schmeda-Hirschmann, G. Direct identification of phenolic constituents in *Boldo Folium* (*Peumus boldus* Mol.) infusions by high-performance liquid chromatography with diode array detection and electrospray ionization tandem mass spectrometry. *J. Chromatogr. A* **2010**, *1217*, 443–449, doi:10.1016/j.chroma.2009.11.014.
88. Leu, C.-H.; Li, C.-Y.; Yao, X.; Wu, T.-S.; Constituents from the leaves of *Phellodendron amurense* and their antioxidant activity. *Chem. Pharm. Bull.* **2006**, *54*, 1308–1311.
89. Delazar, A.; Sabzevari, A.; Mojarrab, M.; Nazemiyeh, H.; Esnaashari, S.; Nahar, L.; Razavi, S.M.; Sarker, S.D. Free-radical-scavenging principles from *Phlomis caucasica*. *J. Nat. Med.* **2008**, *62*, 464.
90. Jung, M.J.; Jung, H.A.; Kang, S.S.; Hwang, G.-S.; Choi, J.S. A new abietic acid-type diterpene glucoside from the needles of *Pinus densiflora*. *Arch. Pharmacol. Res.* **2009**, *32*, 1699–1704, doi:10.1007/s12272-009-2206-x.
91. Ferreres, F.; Esteban, E.; Carpena-Ruiz, R.; Jiménez, M.A.; Tomás-Barberán, F.A. Acylated flavonol spherotriosides from pea shoots. *Phytochemistry* **1995**, *39*, 1443–1446.
92. Kim, S.H.; Jang, S.-D.; Lee, K.Y.; Sung, S.H.; Kim, Y.C. Chemical constituents isolated from *Polygala japonica* leaves and their inhibitory effect on nitric oxide production in vitro. *J. Enzym. Inhib. Med. Chem.* **2009**, *24*, 230–233, doi:10.1080/14756360802051362.
93. Sang, S.; Lapsley, K.; Jeong, W.-S.; Lachance, P.A.; Ho, C.-T.; Rosen, R.T. Antioxidative Phenolic Compounds Isolated from Almond Skins (*Prunus amygdalus* Batsch). *J. Agric. Food Chem.* **2002**, *50*, 2459–2463, doi:10.1021/jf011533+.
94. Jung, H.A.; Kim, A.R.; Chung, H.Y.; Choi, J.S. In vitro antioxidant activity of some selected *Prunus* species in Korea. *Arch. Pharmacol. Res.* **2002**, *25*, 865–872, doi:10.1007/bf02977006.
95. Meng, Z.; Zhou, Y.; Lu, J.; Sugahara, K.; Xu, S.; Kodama, H. Effect of five flavonoid compounds isolated from *Quercus dentata* Thunb on superoxide generation in human neutrophils and phosphorylation of neutrophil proteins. *Clin. Chim. Acta* **2001**, *306*, 97–102, doi:10.1016/s0009-8981(01)00403-x.
96. Sahpaz, S.; Gupta, M.P.; Hostettmann, K. Triterpene saponins from *Randia formosa*. *Phytochemistry* **2000**, *54*, 77–84.
97. Singh, S.; Pandey, M.; Singh, A.; Singh, U.; Pandey, V. A new chalcone glycoside from *Rhamnus nipalensis*. *Nat. Prod. Res.* **2008**, *22*, 1657–1659.
98. Schieber, A.; Mihalev, K.; Berardini, N.; Mollov, P.; Carle, R. Flavonol Glycosides from Distilled Petals of *Rosa damascena* Mill. *Z. Nat. C* **2005**, *60*, 379–384, doi:10.1515/znc-2005-5-602.
99. Chen, Y.; Zhao, Y.; Hu, Y.; Wang, L.; Ding, Z.; Liu, Y.; Wang, J. Isolation of 5-hydroxypyrrolidin-2-one and other constituents from the young fronds of *Pteridium aquilinum*. *J. Nat. Med.* **2008**, *62*, 358–359, doi:10.1007/s11418-008-0225-4.
100. Bai, N.; He, K.; Roller, M.; Lai, C.-S.; Shao, X.; Pan, M.-H.; Ho, C.-T. Flavonoids and Phenolic Compounds from *Rosmarinus officinalis*. *J. Agric. Food Chem.* **2010**, *58*, 5363–5367, doi:10.1021/jf100332w.
101. Badr, A.M.; El-Demerdash, E.; Khalifa, A.E.; Ghoneim, A.I.; Ayoub, N.A.; Abdel-Naim, A.B. Rubus sanctus protects against carbon tetrachloride-induced toxicity in rat isolated hepatocytes: Isolation and characterization of its galloylated flavonoids. *J. Pharm. Pharmacol.* **2009**, *61*, 1511–1520.

102. Chung, S.-K.; Kim, Y.-C.; Takaya, Y.; Terashima, K.; Niwa, M. Novel flavonol glycoside, 7-O-methyl mearnsitrin, from Sageretia theezans and its antioxidant effect. *J. Agric. Food Chem.* **2004**, *52*, 4664–4668.
103. Schmitzer, V.; Veberic, R.; Slatnar, A.; Stampar, F. Elderberry (*Sambucus nigra*L.) Wine: A Product Rich in Health Promoting Compounds. *J. Agric. Food Chem.* **2010**, *58*, 10143–10146, doi:10.1021/jf102083s.
104. Christopoulou, C.; Graikou, K.; Chinou, I. Chemosystematic Value of Chemical Constituents from *Scabiosa hymettia* (Dipsacaceae). *Chem. Biodivers.* **2008**, *5*, 318–323, doi:10.1002/cbdv.200890029.
105. Wolbiś, M.; Nowak, S.; Kicel, A. Polyphenolic compounds in *Scopolia caucasica* Kolesn. ex Kreyer (Solanaceae). *Acta Pol. Pharm.* **2007**, *64*, 241–246.
106. Nowak, S.; Wolbiś, M. Flavonoids from some species of genus *Scopolia* Jacq. *Acta Pol. Pharm.* **2002**, *59*, 275–280.
107. Çalis, I.; Zor, M.; Basaran, A.A.; Wright, A.D.; Sticher, O. Karsoside and scropolioside D, two new iridoid glycosides from *Scrophularia ilwensis*. *J. Nat. Prod.* **1993**, *56*, 606–609.
108. Wang, W.-S.; Lu, P.; Duan, C.-H.; Feng, J.-C. A new jacaranone derivative from *Senecio scandens* var. *incisus*. *Nat. Prod. Res.* **2010**, *24*, 370–374, doi:10.1080/14786410903250936.
109. Huang, H.-C.; Syu, K.-Y.; Lin, J.-K. Chemical Composition of *Solanum nigrum* Linn Extract and Induction of Autophagy by Leaf Water Extract and Its Major Flavonoids in AU565 Breast Cancer Cells. *J. Agric. Food Chem.* **2010**, *58*, 8699–8708, doi:10.1021/jf101003v.
110. Wu, B.; Takahashi, T.; Kashiwagi, T.; Tebayashi, S.-I.; Kim, C.-S. New flavonoid glycosides from the leaves of *Solidago altissima*. *Chem. Pharm. Bull.* **2007**, *55*, 815–816.
111. Choudhary, M.I.; Naheed, N.; Abbaskhan, A.; Ali, S. Hemiterpene glucosides and other constituents from *Spiraea canescens*. *Phytochemistry* **2009**, *70*, 1467–1473, doi:10.1016/j.phytochem.2009.07.013.
112. Cai, L.; Wu, C.D. Compounds from *Syzygium aromaticum* possessing growth inhibitory activity against oral pathogens. *J. Nat. Prod.* **1996**, *59*, 987–990.
113. Abouzid, S.F.; Ali, S.A.; Choudhary, M.I. A new ferulic acid ester and other constituents from *Tamarix nilotica* leaves. *Chem. Pharm. Bull.* **2009**, *57*, 740–742.
114. Marzouk, M.S.; El-Toumy, S.A.; Moharram, F.A. Pharmacologically Active Ellagitannins from *Terminalia myriocarpa*. *Planta Med.* **2002**, *68*, 523–527, doi:10.1055/s-2002-32549.
115. Abe, F.; Iwase, Y.; Yamauchi, T.; Yahara, S.; Nohara, T. Flavonolsinapoyl glycosides from leaves of *Thevetia peruviana*. *Phytochemistry* **1995**, *40*, 577–581.
116. Sharaf, M. Chemical constituents from the seeds of *Trifolium alexandrinum*. *Nat. Prod. Res.* **2008**, *22*, 1620–1623.
117. Han, Y.; Nishibe, S.; Noguchi, Y.; Jin, Z. Flavonol glycosides from the stems of *Trigonella foenum-graecum*. *Phytochemistry* **2001**, *58*, 577–580, doi:10.1016/s0031-9422(01)00273-4.
118. Dini, A.; Rastrelli, L.; Saturnino, P.; Schettino, O. Minor components in food plants--Note I. Flavonol glycosides from *Ullucus tuberosus*. *Boll. Della Soc. Biol. Sper.* **1991**, *67*, 1053–1058.
119. Ek, S.; Kartimo, H.; Mattila, S.; Tolonen, A. Characterization of Phenolic Compounds from Lingonberry (*Vaccinium vitis-idaea*). *J. Agric. Food Chem.* **2006**, *54*, 9834–9842, doi:10.1021/jf0623687.
120. Majinda, R.R.; Motswaledi, M.; Waigh, R.D.; Waterman, P.G. Phenolic and antibacterial constituents of *Vahlia capensis*. *Planta Med.* **1997**, *63*, 268–270.
121. Malafronte, N.; Pesca, M.S.; Bisio, A.; Escobar, L.M.; De Tommasi, N. New flavonoid glycosides from *Vernonia ferruginea*. *Nat. Prod. Commun.* **2009**, *4*, 1934578X0900401205, doi:10.1177/1934578x0900401205.
122. Seetharaman, T.; Petrus, A. Note: Novel acylkaempferol glycoside from the endemic species, *Vernonia travancorica* Hook. f. *J. Asian Nat. Prod. Res.* **2004**, *6*, 295–299, doi:10.1080/1028602031000147401.
123. Szostak, H.; Kowalewski, Z. The flavonoids in the leaves of *Vinca minor* L. (Apocynaceae). *Pol. J. Pharmacol. Pharm.* **1975**, *27*, 657–663.
124. Castillo-Muñoz, N.; Gómez-Alonso, S.; García-Romero, E.; Hermosín-Gutiérrez, I. Flavonol Profiles of *Vitis vinifera* Red Grapes and Their Single-Cultivar Wines. *J. Agric. Food Chem.* **2007**, *55*, 992–1002, doi:10.1021/jf062800k.
125. Rao, Y.K.; Fang, S.-H.; Tzeng, Y.-M. Inhibitory effects of the flavonoids isolated from *Waltheria indica* on the production of NO, TNF- $\alpha$  and IL-12 in activated macrophages. *Biol. Pharm. Bull.* **2005**, *28*, 912–915.

126. Manguro, L.O.A.; Ugi, I.; Lemmen, P.; Hermann, R. Flavonol glycosides of *Warburgiaugandensis* leaves. *Phytochemistry***2003**, *64*, 891–896.
127. Niklas, K.J.; Giannasi, D.E. Flavonoids and Other Chemical Constituents of Fossil Miocene *Zelkova* (Ulmaceae). *Science***1977**, *196*, 877–878, doi:10.1126/science.196.4292.877.
128. Coelho, R.G.; Di Stasi, L.C.; Vilegas, W. Chemical constituents from the infusion of *Zollerniaailicifolia* Vog. and comparison with *Maytenus* species. *Z. Nat. C***2003**, *58*, 47–52.
